# Supplementary material
Source: MDPI journal article supplement (https://www.mdpi.com/2075-4442/9/10/103)
Supplement: s1 [file s1]

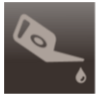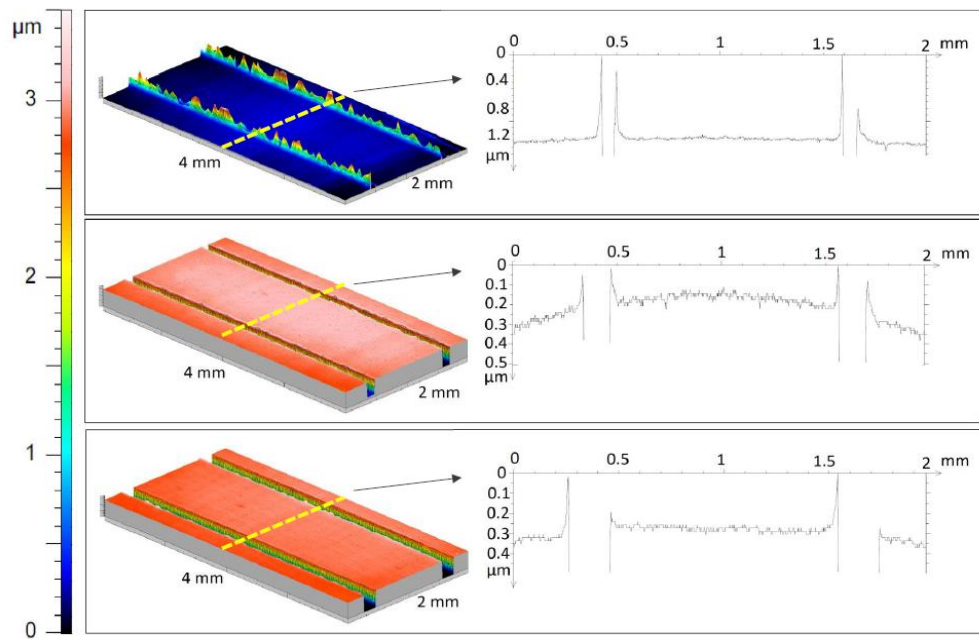

Figure S1. An enlarged view of the grooved blocks and the associated profile for the 50  $\mu\text{m}$  grooved block (upper), 100  $\mu\text{m}$  grooved block (middle) and 150  $\mu\text{m}$  grooved block (lower). The pileup is seen at the edge of the grooves.

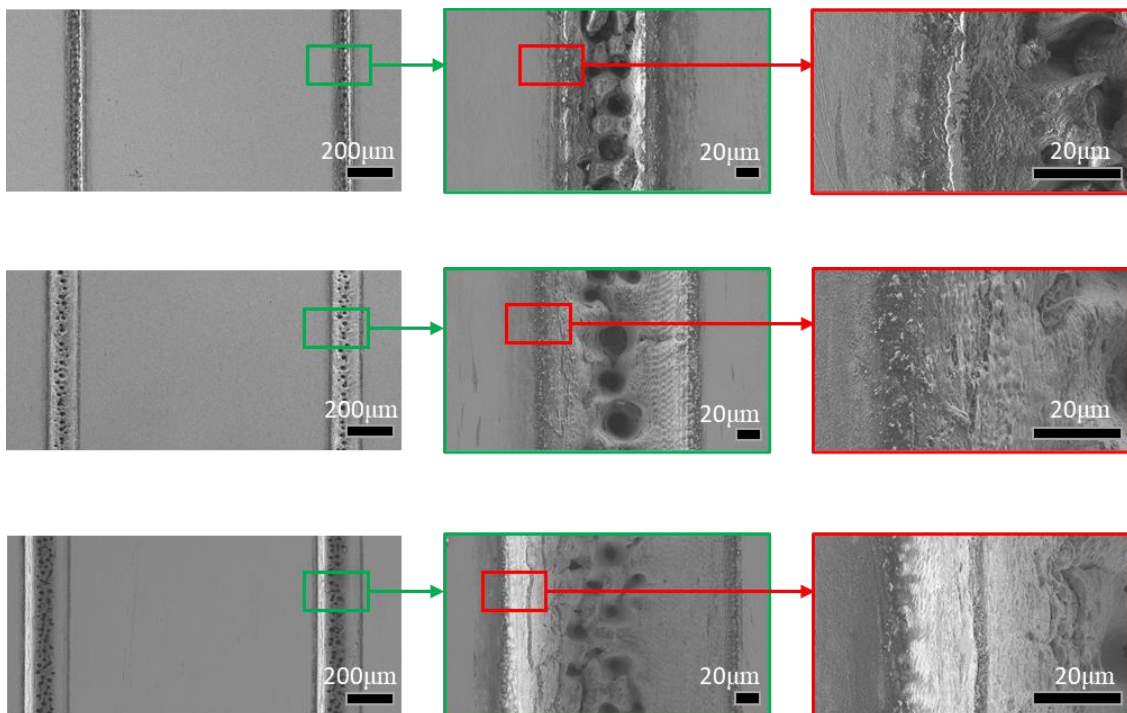

Figure S2. SEM micrographs showing the grooves seen at lower magnification, the holes in the grooves at the intermediate magnification, and the pileup at higher magnification.
